# Supplementary material
Source: ML conference proceedings conference paper supplement (https://openreview.net/forum?id=MK4IQJdLLeo)
Supplement: supplementary_material [file attachment]

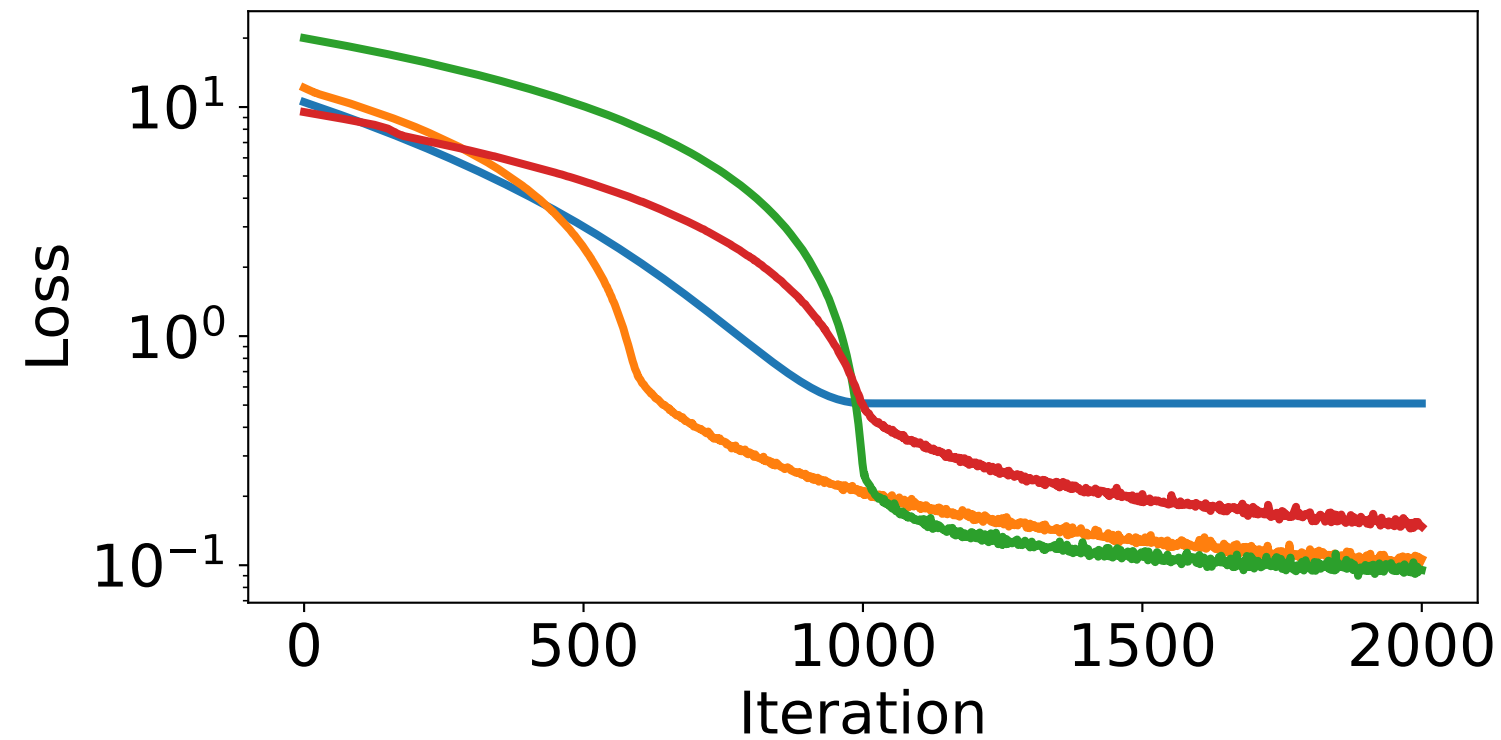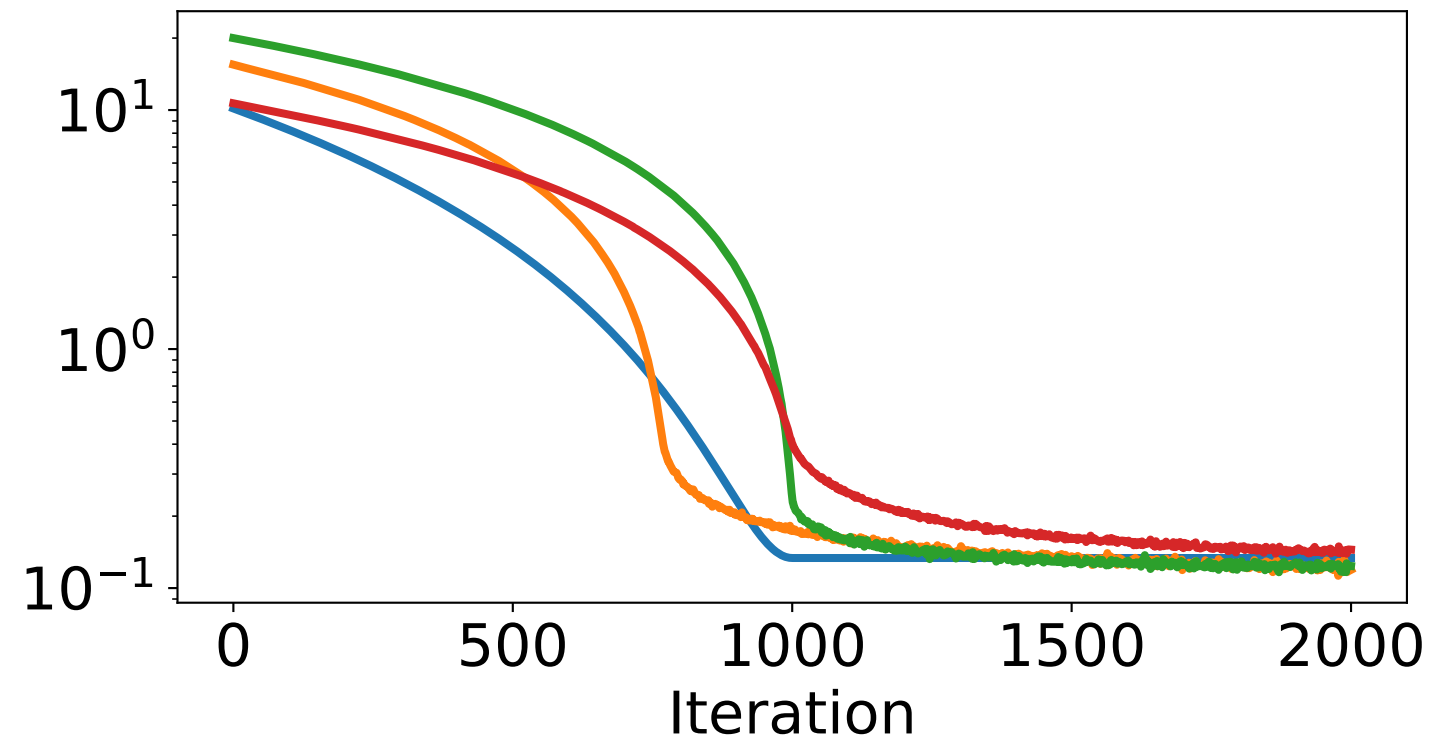

— Random Initialization    — Pre-Optimization    — No Pre-Optimization    — Foreground/Background Separation
