# Supplementary material
Source: ML conference proceedings conference paper supplement (https://openreview.net/forum?id=MK4IQJdLLeo)

Normalized  
Distortion [%]

100  
75  
50  
25  
0

0%

20%

40%

60%

80%

100%

Randomized relevant components

- R. Pixel (ViT)
- R. Wavelets (ViT)
- CartoonX (CNN)
- CartoonX (ViT)
- Attention rollout

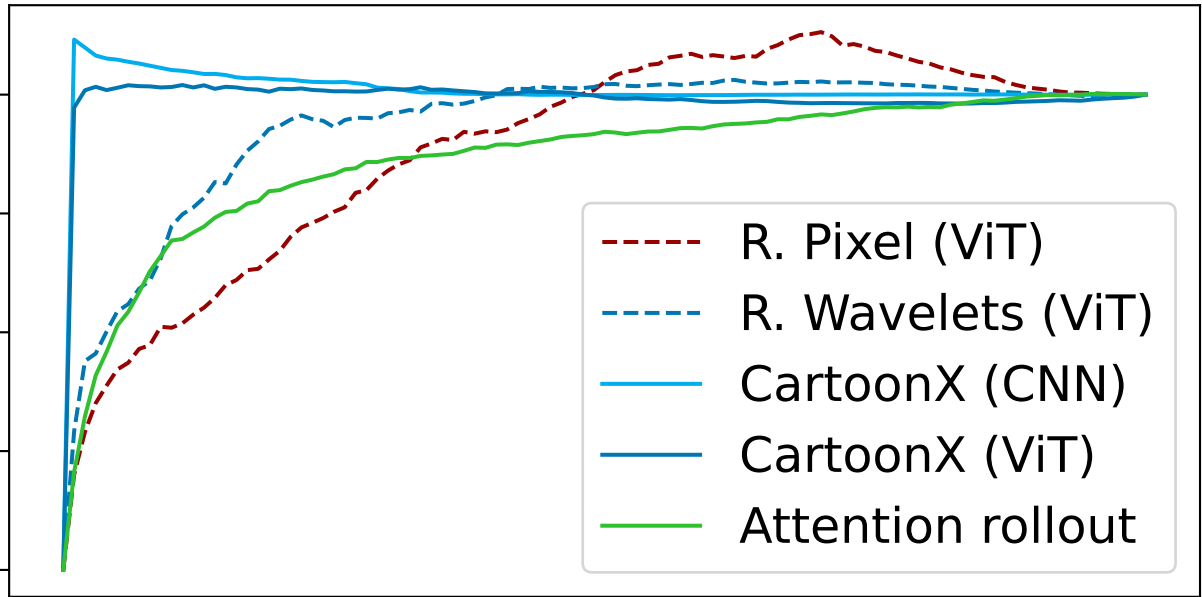

Supplement: supplementary_material [file attachment]
